# Supplementary material for: Investigation of ED4 supplementation on cardiovascular parameters in rats with elevated systemic TMAO
Source: Research Square preprint supplement (doi:10.21203/rs.3.rs-6755780/v1), 2025-06-25
Supplement: Supplementary file 1 [file 9f1b9feea43719b9d2301645.docx]

**Supplementary material**


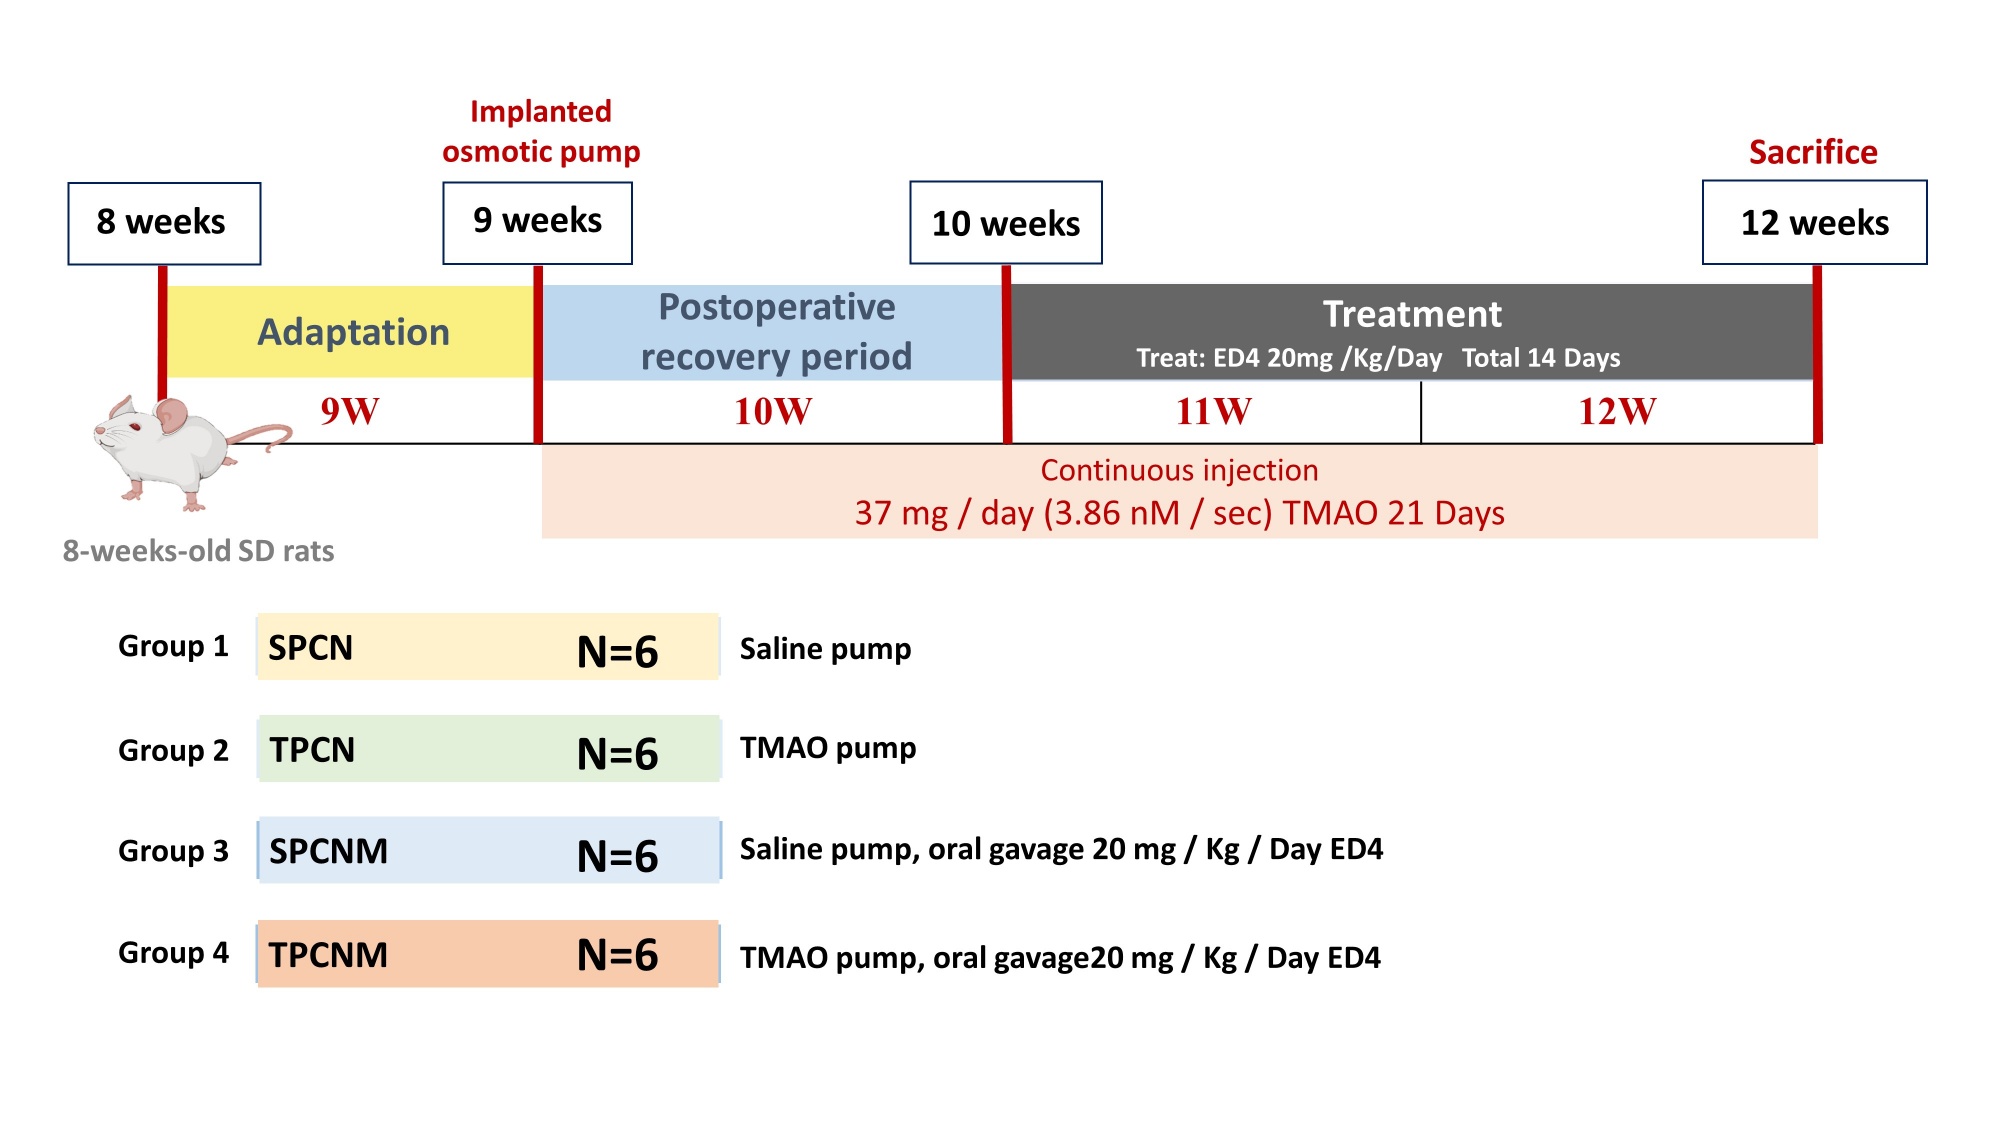


Fig. S1. Experiments design
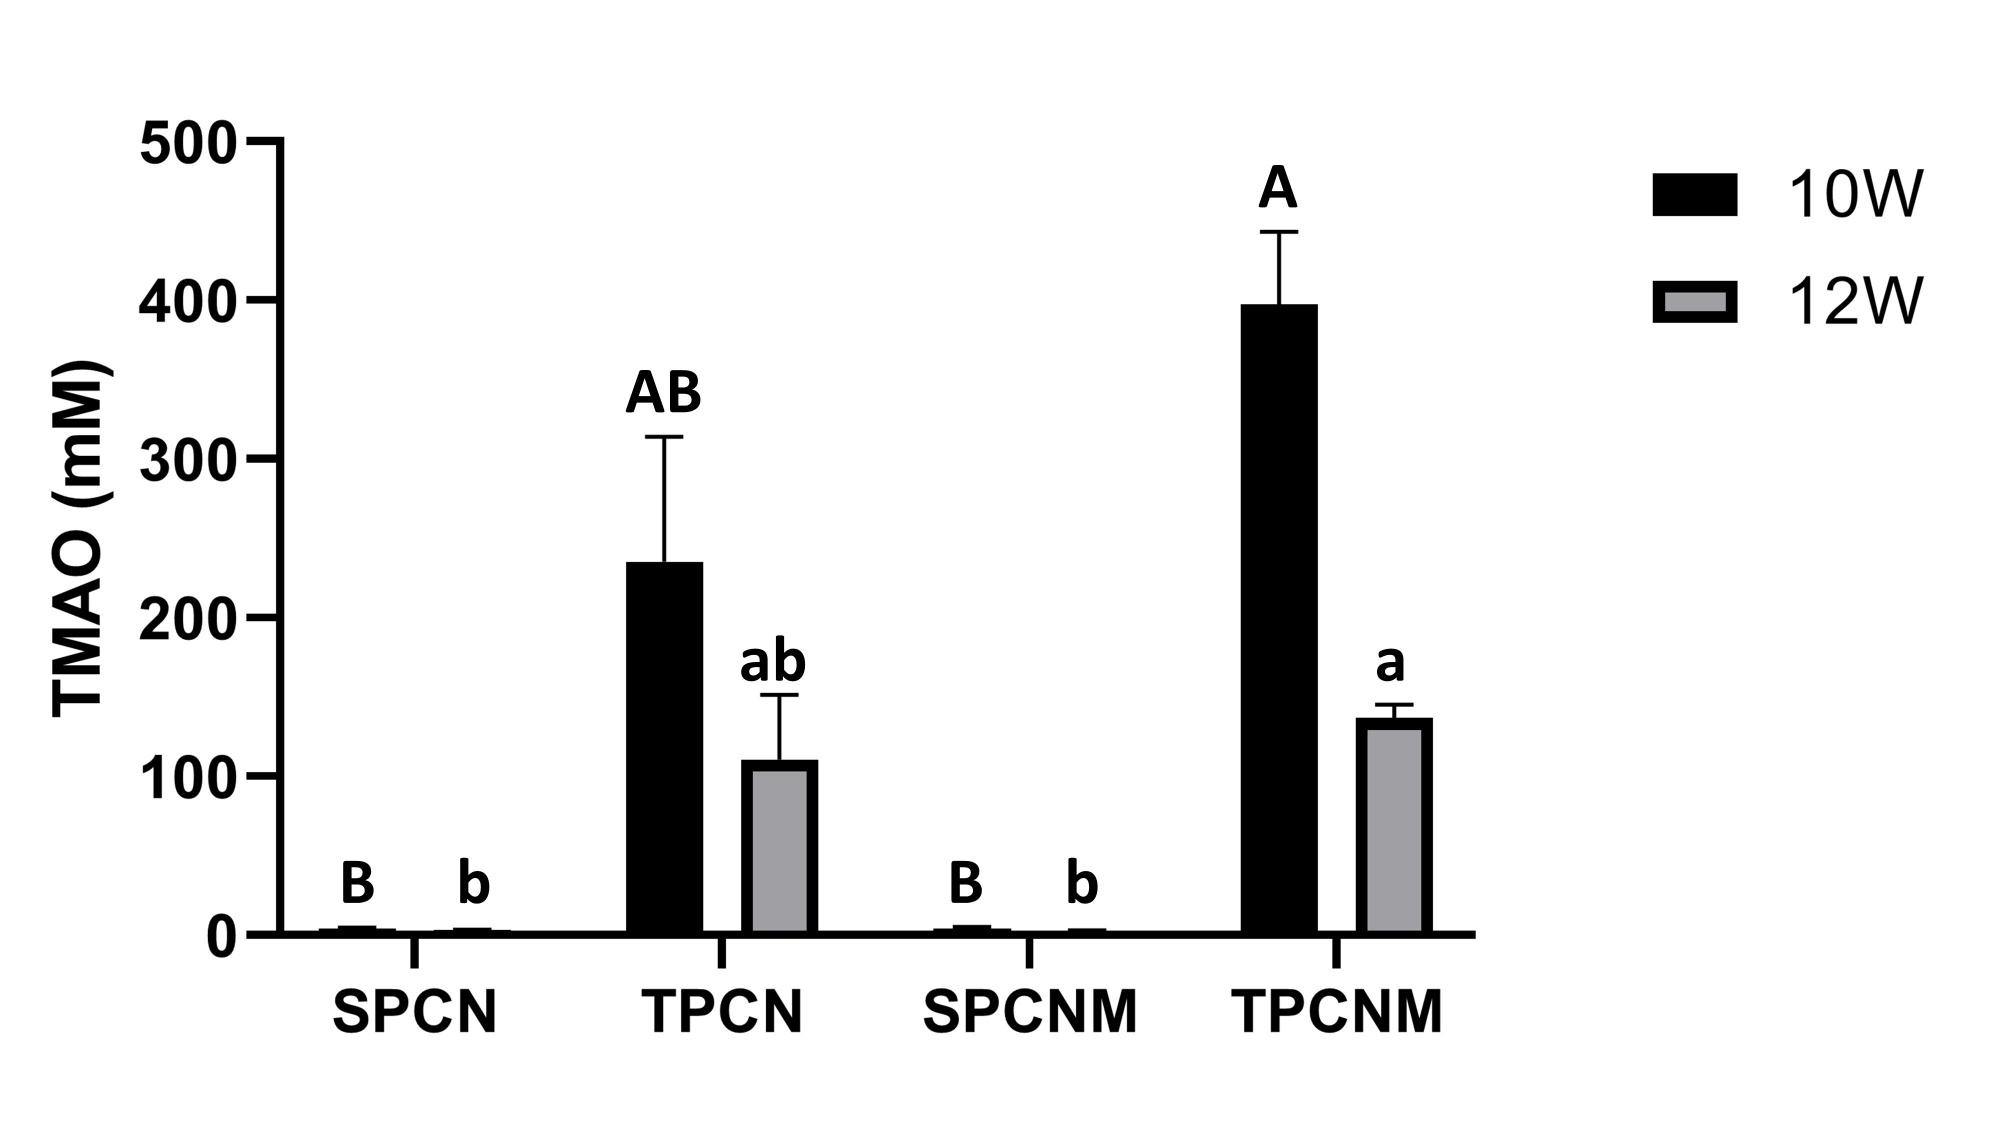


Fig. S2. Effect of continuous ED4 supplementation on urinary TMAP in rats exposed to high levels of systemic TMAO.


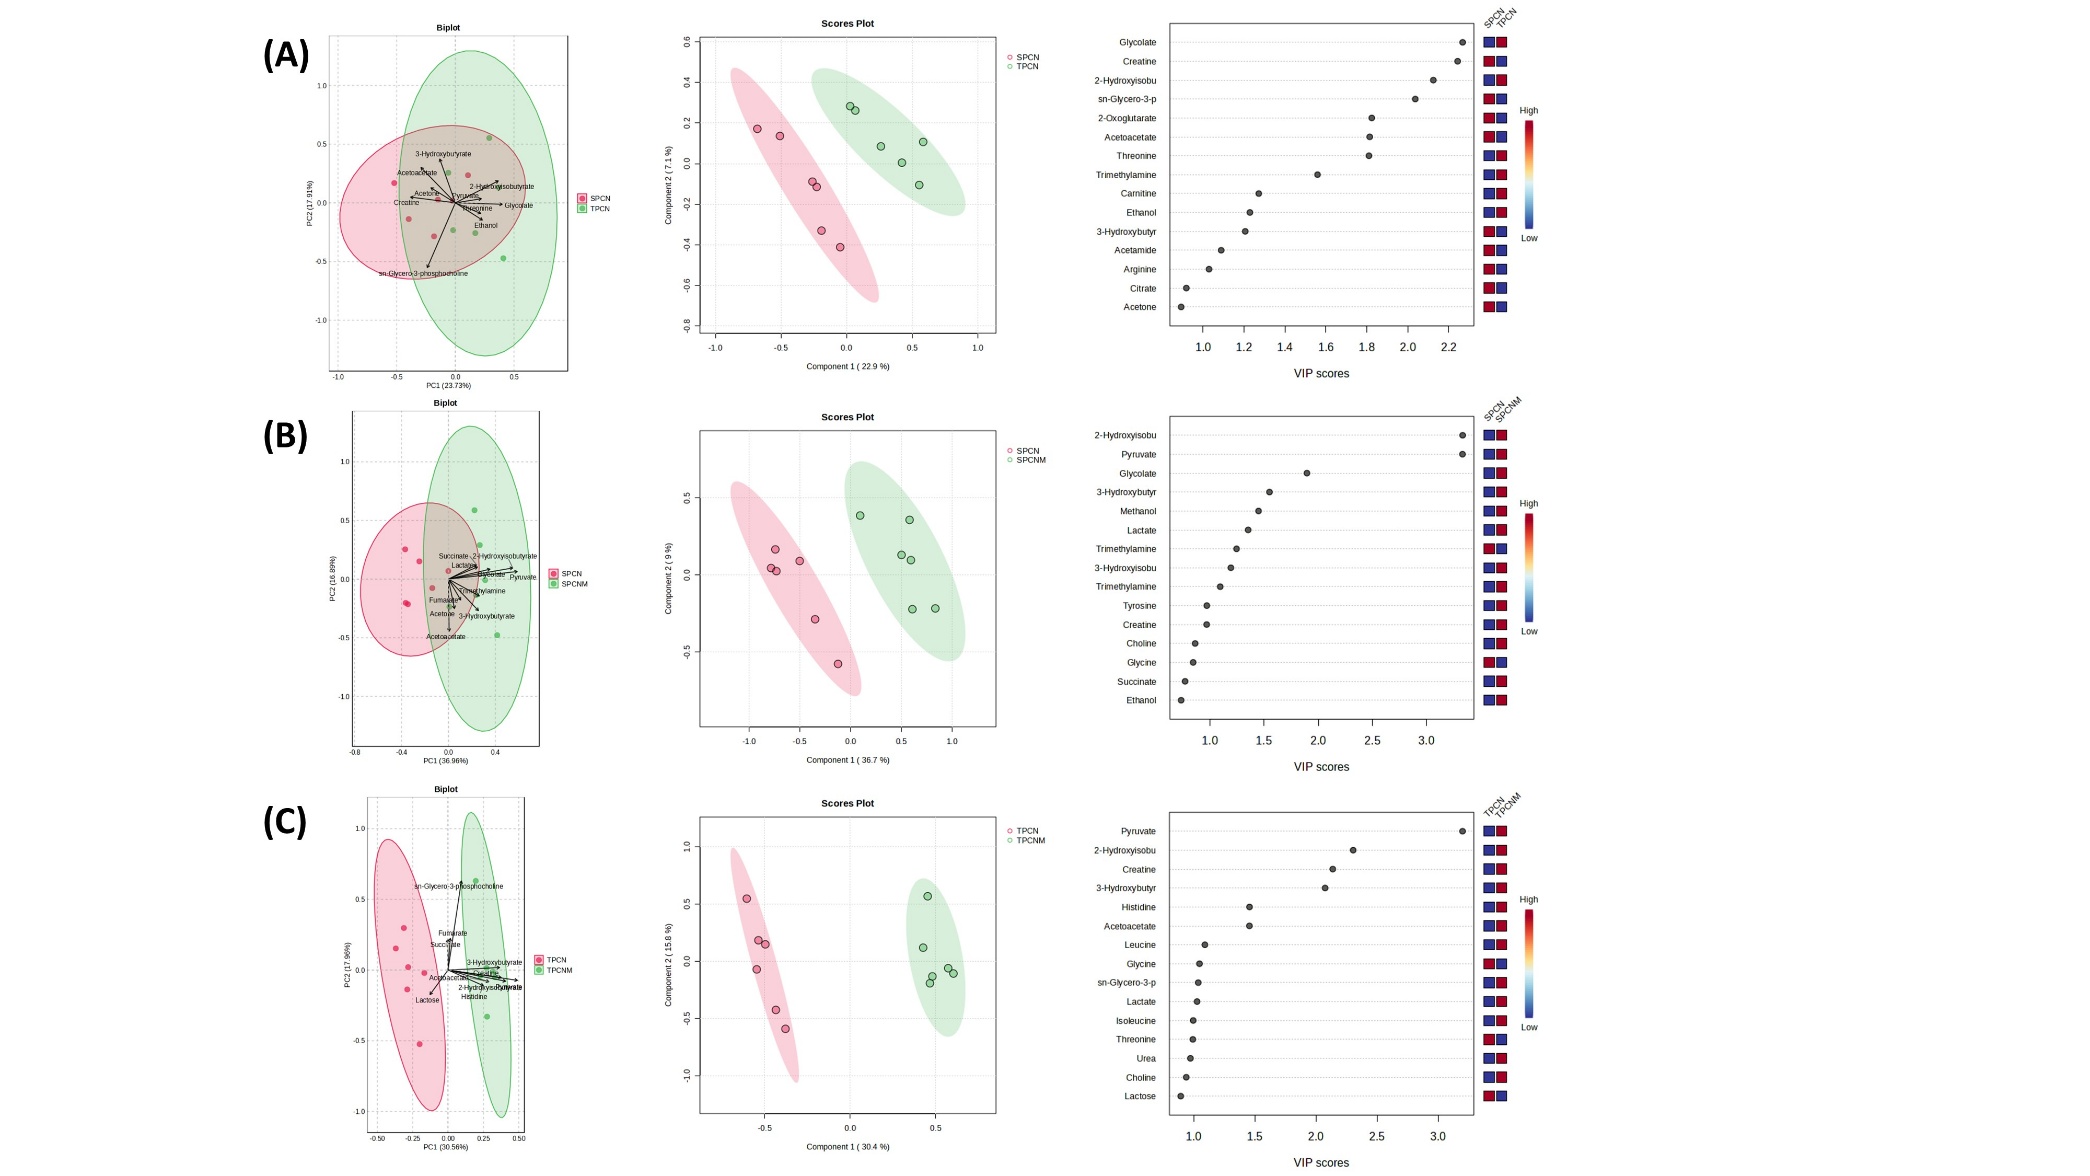


Fig. S3. Effect of continuous ED4 supplementation on serum metabolomics in rats exposed to high levels of systemic TMAO. Includes PCA plot, PLS-DA plot, and VIP scores from PLS-DA comparing SPCN vs. TPCN (A), SPCN vs. SPCNM (B), and TPCN vs. TPCNM (C).


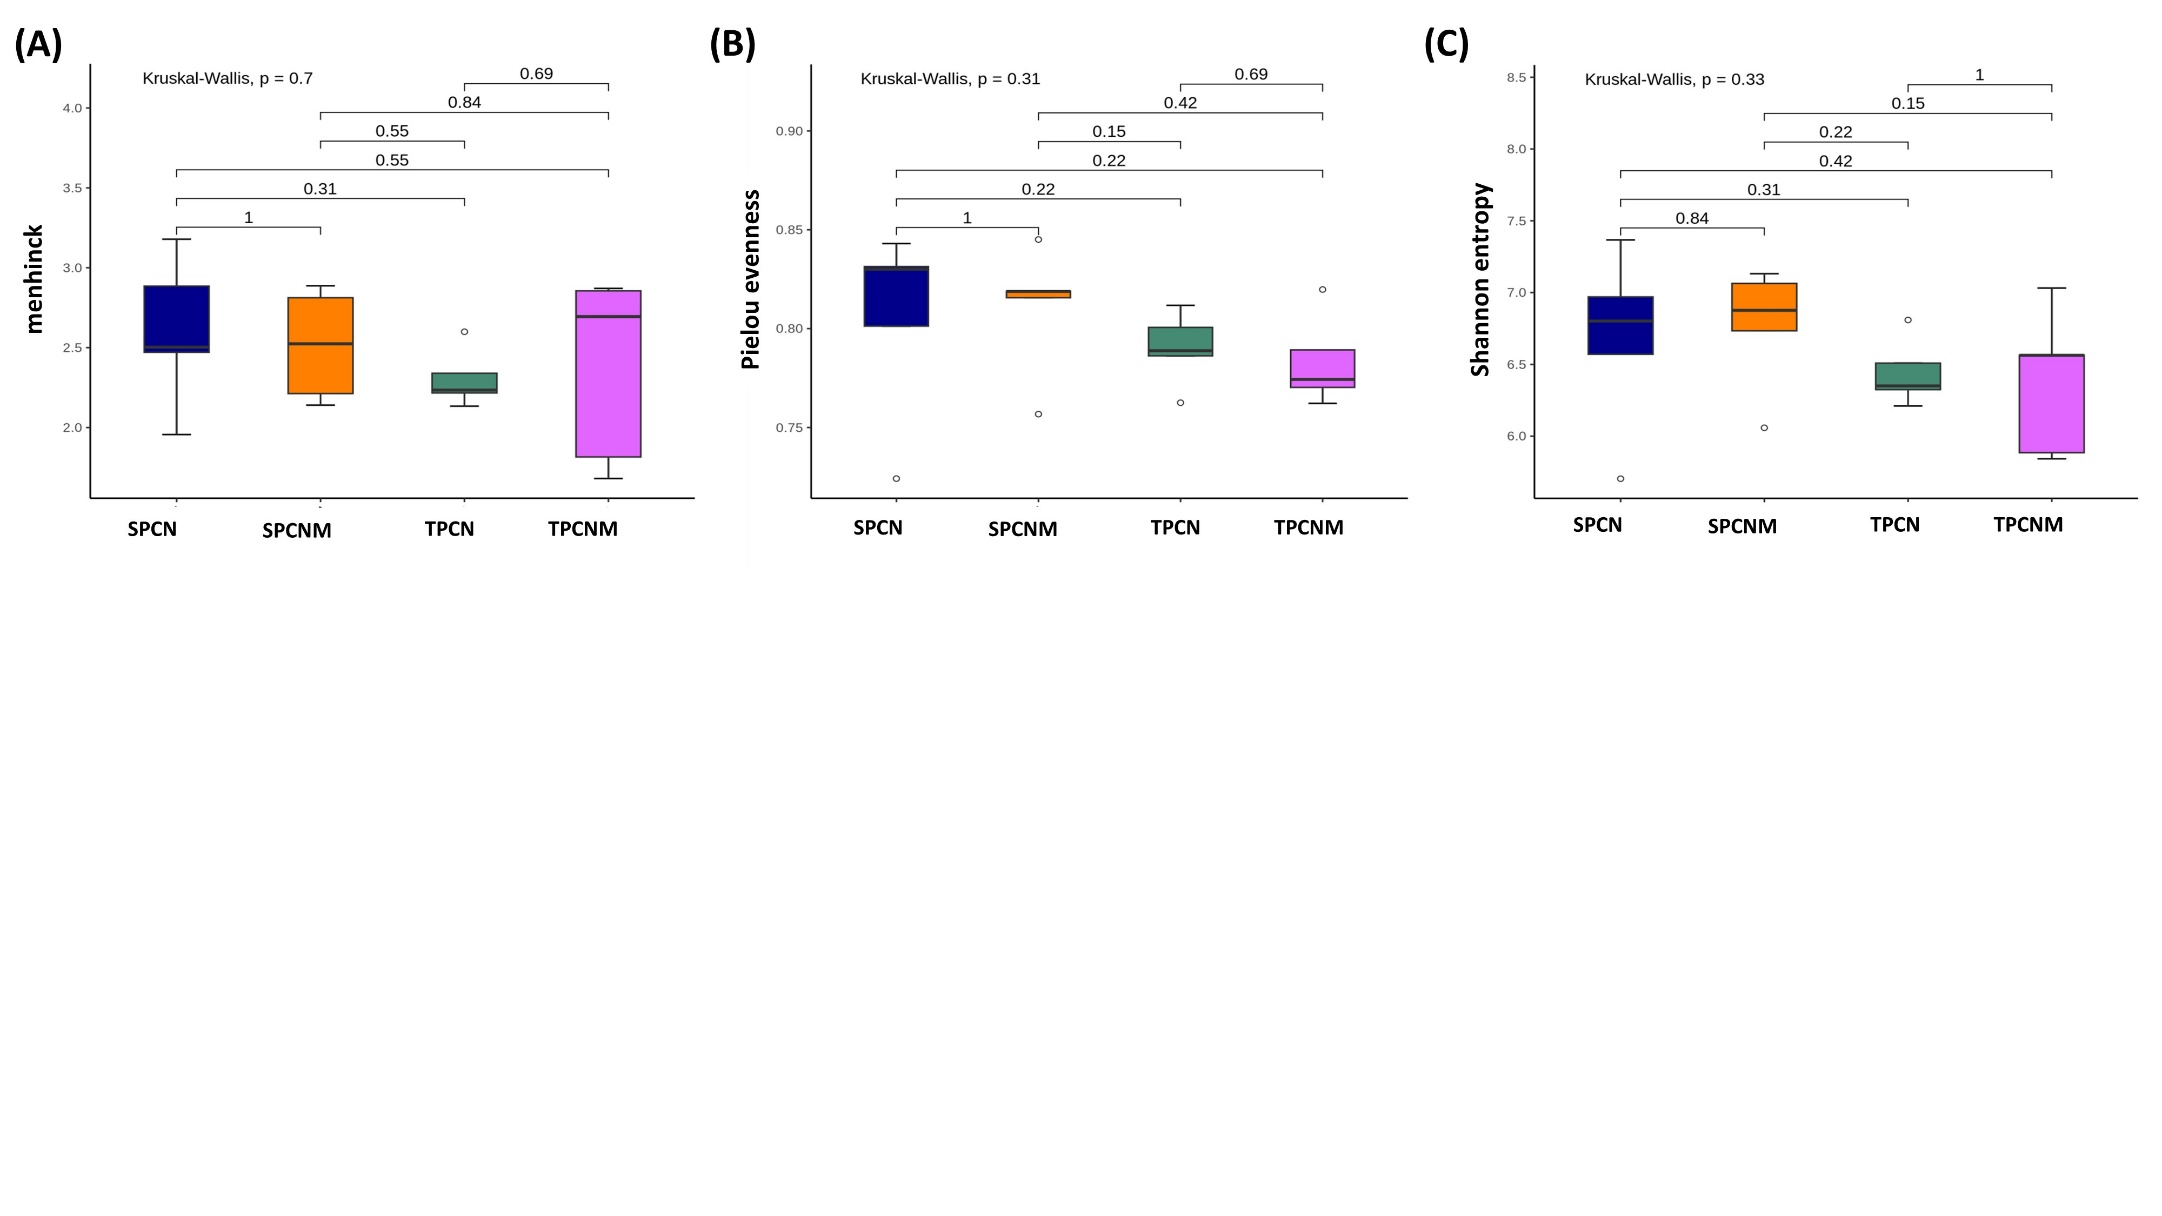


Fig. S4. Effects of continuous ED4 supplementation on α-diversity indices, including Menhinick index (A), Pielou's evenness (B), and Shannon entropy (C), in the intestinal microbiota of rats exposed to high systemic TMAO levels.
